# Supplementary material
Source: publisher figshare collection journal article supplement (https://tandf.figshare.com/articles/dataset/_/12860020)
Supplement: Supplementary file 1 [file 3]

**Supplementary Figure 1**

A timeline for each experimental group including control group (n = 6), AA group (n = 6), BMSC-inhibitor NC group (n = 6), BMSC-miR-146b-5p inhibitor group (n = 6).
